# Supplementary material for: The evolution of ependymin-related proteins
Source: PubMed Central journal article supplement (PMC6280359; doi:10.1186/s12862-018-1306-y), 2018-12-04
Supplement: 12862_2018_1306_MOESM5_ESM.pdf [file 12862_2018_1306_MOESM5_ESM.pdf]

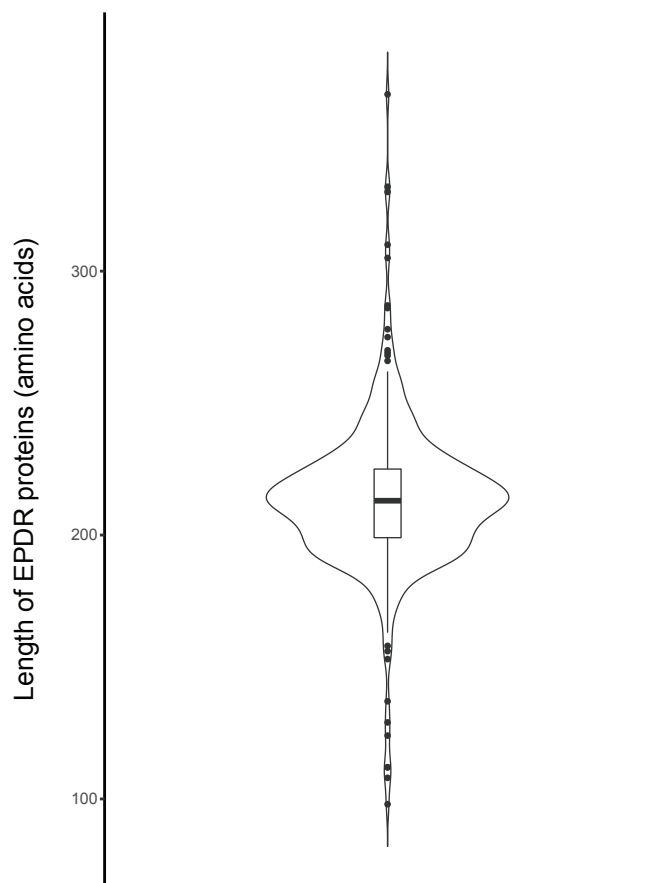

**Additional file 5.** Length of EPDR sequences identified in this study. The violin plot displays the length distribution of probable full-length (methionine start, signal peptide, and stop codon) EPDRs. The box plot in the centre indicates the median length (horizontal line, equal to 213 amino acids), as well as the second and third quartiles.
