# Supplementary material for: The evolution of ependymin-related proteins
Source: PubMed Central journal article supplement (PMC6280359; doi:10.1186/s12862-018-1306-y), 2018-12-04
Supplement: 12862_2018_1306_MOESM8_ESM.pdf [file 12862_2018_1306_MOESM8_ESM.pdf]

## *Acanthaster planci*

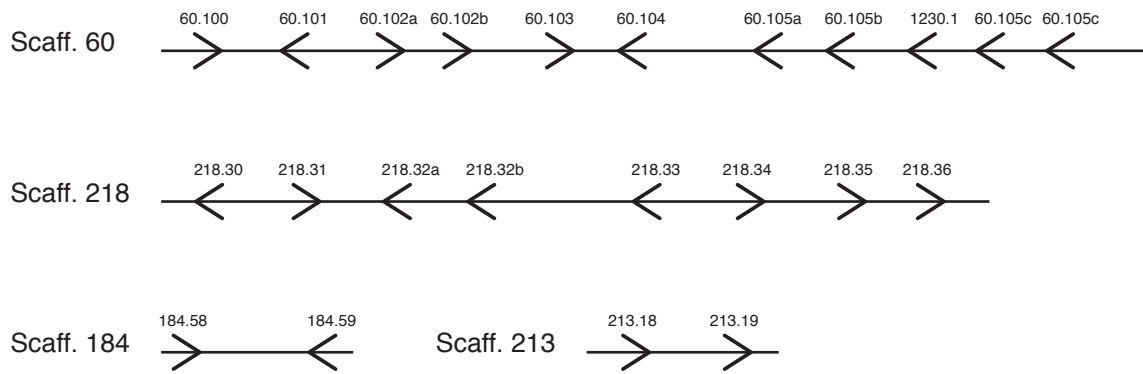

## *Amphimedon queenslandica*

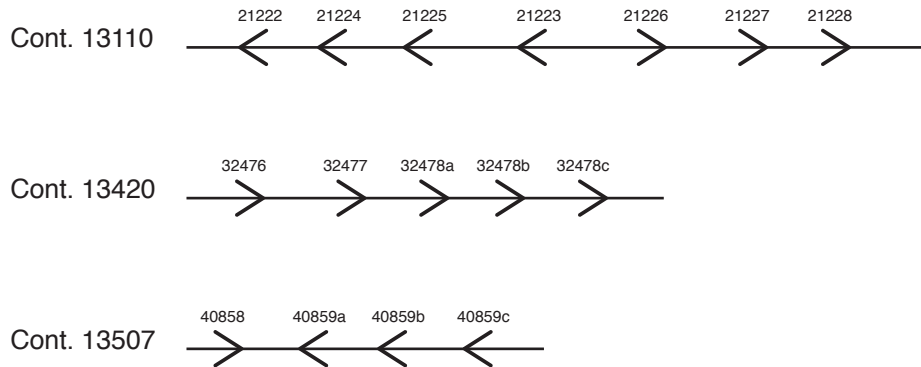

## *Branchiostoma belcheri*

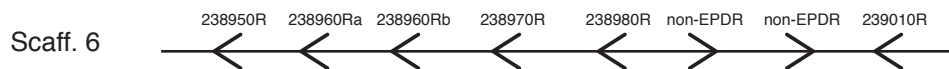

**Additional File 8.** Clustering of EPDR genes in genomes. Many EPDR genes are clustered on scaffolds within *A. planci*, *A. queenslandica* and *B. belcheri* genomes. Arrowheads indicate the direction of transcription. Not to scale.
