# Supplementary material for: The evolution of ependymin-related proteins
Source: PubMed Central journal article supplement (PMC6280359; doi:10.1186/s12862-018-1306-y), 2018-12-04
Supplement: 12862_2018_1306_MOESM9_ESM.pdf [file 12862_2018_1306_MOESM9_ESM.pdf]

**Additional file 9.** Predicted model scores and ligands for representative EPDR sequences.

| Protein                               | Clade/<br>profile | C-Score<br>(model) | Predicted ligands                    | C-Score<br>(ligand) |
|---------------------------------------|-------------------|--------------------|--------------------------------------|---------------------|
| <i>D. rerio</i> 134034                | 1/1               | -1.20              | Phenylpyruvic acid                   | 0.07                |
| <i>M. musculus</i> ENSMUSP00000002885 | 1/1               | -0.78              | Tetraethylene glycol monoethyl ether | 0.05                |
|                                       |                   |                    | Tetraethylene glycol                 | 0.37                |
|                                       |                   |                    | Peptide                              | 0.06                |
|                                       |                   |                    | Phenylpyruvic acid                   | 0.06                |
| <i>C. owczarzaki</i> 30864            | 1/1               | -0.64              | Tetraethylene glycol monoethyl ether | 0.04                |
|                                       |                   |                    | Tetraethylene glycol                 | 0.21                |
|                                       |                   |                    | Tetraethylene glycol monoethyl ether | 0.07                |
| <i>S. kowalevskii</i> 91225509        | 2/2               | -2.85              | Tetraethylene glycol monoethyl ether | 0.10                |
| <i>C. globosum</i> HO349164           | 2/2               | -3.03              | Phenylpyruvic acid                   | 0.10                |
|                                       |                   |                    | Tetraethylene glycol                 | 0.23                |
|                                       |                   |                    | Tetraethylene glycol monoethyl ether | 0.07                |
| <i>N. gruberi</i> EFC42264            | 2/3               | -2.44              | Phenylpyruvic acid                   | 0.06                |
|                                       |                   |                    | Tetraethylene glycol                 | 0.15                |
|                                       |                   |                    | Tetraethylene glycol monoethyl ether | 0.15                |
| <i>A. californica</i> c13118          | 2/3               | -1.74              | Tetraethylene glycol                 | 0.13                |
|                                       |                   |                    | Tetraethylene glycol monoethyl ether | 0.07                |

Details of 3D modelling of EPDR sequences in I-TASSER. C-score (model) is the confidence score of the model on a scale of -5 to 2, where higher values signify higher confidence. C-score (ligand) denotes the confidence of the ligand prediction on a scale of 0 to 1, with higher values again signifying higher confidence.
